# Supplementary material for: Polo‐Like Kinase 2 is Dynamically Regulated to Coordinate Proliferation and Early Lineage Specification Downstream of Yes‐Associated Protein 1 in Cardiac Progenitor Cells
Source: PubMed Central journal article supplement — J Am Heart Assoc. 2017 Oct 24;6(10):e005920. doi: 10.1161/JAHA.117.005920 (PMC5721832; doi:10.1161/jaha.117.005920), 2017-10-24
Supplement: JAH3-6-e005920-s001.pdf [file JAH3-6-e005920-s001.pdf]

## **Supplemental Material**

**Table S1. List of primers, cycle numbers (# cycles) and temperatures (°C)**

| rat qPCR   | Gene           | For                      | Rev                       |          |    |
|------------|----------------|--------------------------|---------------------------|----------|----|
|            | <i>Ctgf</i>    | ATCCCTGCGACCCACACA       | ACGGACCCACCGAAGACA        |          |    |
|            | <i>Cyr61</i>   | CCACCGCTCTGAAAGGGGA      | CCACAGCACCGTCAATACATG     |          |    |
|            | <i>Plk2</i>    | CCGAGATCTCGCGGATTATAGT   | CTGTCAATTCGTAACACTTTGCAA  |          |    |
|            | <i>Gata 4</i>  | CCTGCGAGACACCCCAATC      | TCCTGTCCCATCTCGCTC        |          |    |
|            | <i>Tnni3</i>   | AGCCACATGCCAAGAAAAAGTC   | TCACGCTCCATCTCCTGCTT      |          |    |
|            | <i>Myh7b</i>   | GGTGAGCGTGGTTACCATGTCT   | GTGGTGACCCCTGACTGC        |          |    |
|            | <i>Vwf</i>     | TGAGAACCAGCGGTGTAAACG    | CCGACGCCGTCTTCAGTAAC      |          |    |
|            | <i>Pecam1</i>  | AGCATTGTGACCAGTCTCCGA    | GCAATGACCACTCCAATGACAA    |          |    |
|            | <i>Lats2</i>   | GGAGTTGGTGAATGCAGGATGT   | TTGCTCATTCTGGGGTCC        |          |    |
|            | <i>r18S</i>    | CCATTGGAACGTCTGCCCTAT    | GTCACCCGTGGTCACCATG       |          |    |
| rat PCR    | Gene           | For                      | Rev                       | # cycles | °C |
|            | <i>Abcg2</i>   | ACCCTGCAGACTTCTTCCTTGAC  | AGTAAAGGGCACCAATAATCAGTCC | 30       | 60 |
|            | <i>Kit</i>     | CGCCAGGAGACGCTGACTAT     | TTAGGGTAGGCCTCGAACTCAAC   | 30       | 60 |
|            | <i>Pou5f1</i>  | GCGCCGTGAAGTTGGAGA       | TGATCCTCTTCTGTTTCAGCAGC   | 30       | 60 |
|            | <i>Nanog</i>   | AGGTACCTCAGCTCCAGCA      | CTGCCACCTCTTGCACTTCA      | 38       | 60 |
|            | <i>Abcb1a</i>  | AGCCCTGTTCTTGACTGTCA     | TTGCATAAGCCTGGAGTTCCCTTA  | 30       | 60 |
|            | <i>Abcb1b</i>  | AACCTGCTGTTGGCATATTCCG   | GTGGATGATAGCAGCGAGAGTTC   | 30       | 60 |
|            | <i>Nkx2.5</i>  | ATTTTATCCGCGAGCCTACG     | CAGGTACCCTGTTGCTTGAA      | 30       | 60 |
|            | <i>Gata4</i>   | CTGTGCCAACTGCCAGACTA     | AGATTCTTGGGCTCCGTTT       | 25       | 57 |
|            | <i>Myh7b</i>   | GGTGAGCGTGGTTACCATGTCT   | ACTCTGGCCCTTGGTCACATAC    | 30       | 57 |
|            | <i>Myh6</i>    | TGATGACTCCGAGGAGCTTT     | TGACACAGACCCTTGAGCAG      | 39       | 60 |
|            | <i>Tnni3</i>   | ACGTGGAAGCAAAGTCACC      | CCTCCTTCTTCACCTGCTTG      | 30       | 57 |
|            | <i>Vwf</i>     | TGAGAACCAGCGGTGTAAACG    | CCGACGCCGTCTTCAGTAAC      | 32       | 57 |
|            | <i>Pecam1</i>  | AGCATTGTGACCAGTCTCCGA    | GCAATGACCACTCCAATGACAA    | 32       | 57 |
|            | <i>Gapdh</i>   | CAGAACATCATCCCTGCATCC    | AGGTCCACCACCCTGTTGC       | 30       | 57 |
|            | <i>Tbx18</i>   | TGCCAAGGCTTCCGAGAC       | AAGGTGAGAGTTCGTAGTGATGGC  | 25       | 57 |
|            | <i>Wt1</i>     | CATCCTCTGTGGTGCCAGT      | CAGATGCTGACCGGACAAGAG     | 30       | 57 |
|            | <i>Aldh1a2</i> | TACATCGATTTGCAGGGAGTCA   | TAGACCACAGTGTACCACAGCA    | 30       | 57 |
|            | <i>Tcf21</i>   | AAGGCCTTCTCCAGGCTCAA     | CTCGCGGTCAACACTTCT        | 30       | 57 |
| mouse qPCR | Gene           | For                      | Rev                       |          |    |
|            | <i>Ctgf</i>    | CTTCTGCGATTTGCGCTCC      | ACACCGACCCACCGAAGAC       |          |    |
|            | <i>Cyr61</i>   | CCACCGCTCTGAAAGGGAT      | CACGGCGCCATCAATACAT       |          |    |
|            | <i>Plk2</i>    | ATGGAGCTGAAGGTGGGAGAC    | GAGGACTTCGGGGGAGAGATA     |          |    |
|            | <i>Gata 4</i>  | GCCAACCCTGGAAGACACC      | GACATGGCCCCACAATTGAC      |          |    |
|            | <i>Tnni3</i>   | CTGCCAACTACCGAGCCTATG    | CGTTCCATCTCCTGCTTCG       |          |    |
|            | <i>Vwf</i>     | GATGGAGGGGAGCTTGAAGT     | CGACTCCACCACCTCAAAGT      |          |    |
|            | <i>r18S</i>    | CCATTGGAACGTCTGCCCTAT    | GTCACCCGTGGTCACCATG       |          |    |
| mouse PCR  | Gene           | For                      | Rev                       | # cycles | °C |
|            | <i>Abcg2</i>   | CATGAAACCTGGCCTTAATGC    | CTCCTCCAGAGATGCCACG       | 25       | 60 |
|            | <i>Kit</i>     | CAGGACCTCGGCTAACAAAGG    | TGGTCAGGCGAAGTTGGTTC      | 25       | 60 |
|            | <i>Pou5f1</i>  | GGAGTCCCAGGACATGAAAGC    | TGCTGTAGGGAGGGCTTCG       | 25       | 60 |
|            | <i>Nanog</i>   | GGTGGCAGAAAAACAGTGG      | GCTTCCAGATGCGTTCACC       | 38       | 60 |
|            | <i>Abcb1a</i>  | ATAATAGGATTTACCCGTGGCTGG | CCCATACCAGAATGCCAGAGC     | 25       | 60 |
|            | <i>Abcb1b</i>  | TCAACTACCCATCGAGAAGCG    | GGCATTGGCTTCTTGACAG       | 25       | 60 |
|            | <i>Nkx2.5</i>  | CCTGACCCAGCCAAAGACC      | CACTTGTAGCGACGTTCTGG      | 38       | 60 |
|            | <i>Gata4</i>   | GCCGATCATCACCAGAATCC     | TCCAGCCTCTCGGTCATCTC      | 25       | 60 |
|            | <i>Myh7b</i>   | CCGTTTTGGCAAGTTCATCC     | AAGTTCCTCGCCGTCATCC       | 30       | 57 |
|            | <i>Myh6</i>    | GCCAACCCTGGAAGACACC      | TTGCAAGAGGCTGGGAA         | 38       | 60 |
|            | <i>Tnni3</i>   | CTGCCAACTACCGAGCCTATG    | CCCTCAGGTCCAAGGATTCC      | 30       | 60 |
|            | <i>Vwf</i>     | GATGGAGGGGAGCTTGAAGT     | AGTTGACGGGGTCTTCTCC       | 38       | 60 |
|            | <i>Pecam1</i>  | CGTGAATGACACCCAAGCG      | CACGGGTTTCTGTTTGCC        | 38       | 60 |
|            | <i>Gapdh</i>   | CAGAACATCATCCCTGCATCC    | AGGTCCACCACCCTGTTGC       | 25       | 60 |

**Table S2. Complete list of genes regulated on FN versus LN**

|           | <b>EntrezID</b> | <b>Symbol</b> | <b>log2FC</b> | <b>adj.P.Val</b> |
|-----------|-----------------|---------------|---------------|------------------|
| <b>1</b>  | 83476           | Cyr61         | 3.39          | 2.5E-40          |
| <b>2</b>  | 64032           | Ctgf          | 2.04          | 2.7E-30          |
| <b>3</b>  | 83722           | Plk2          | 1.71          | 4.2E-28          |
| <b>4</b>  | 287362          | Nlrp3         | 1.69          | 1.4E-14          |
| <b>5</b>  | 100861535       | Rn28s         | 1.51          | 1.1E-03          |
| <b>6</b>  | 24723           | Rn45s         | 1.47          | 2.4E-06          |
| <b>7</b>  | 65157           | Amotl2        | 1.43          | 1.3E-27          |
| <b>8</b>  | 85265           | Ajuba         | 1.41          | 3.5E-29          |
| <b>9</b>  | 289419          | Nuak2         | 1.34          | 3.8E-20          |
| <b>10</b> | 259227          | Vofl6         | 1.31          | 9.2E-10          |
| <b>11</b> | 27064           | Ankrd1        | 1.23          | 2.4E-06          |
| <b>12</b> | 299626          | Gadd45b       | 1.20          | 2.2E-13          |
| <b>13</b> | 85471           | Gata3         | 1.16          | 9.0E-11          |
| <b>14</b> | 362993          | Rnd1          | 1.09          | 1.3E-10          |
| <b>15</b> | 25433           | Hbegf         | 1.07          | 1.1E-03          |
| <b>16</b> | 29637           | Hmgcs1        | 1.06          | 1.7E-06          |
| <b>17</b> | 366492          | Epha2         | 1.03          | 1.1E-06          |
| <b>18</b> | 361679          | Dusp8         | 0.96          | 1.6E-05          |
| <b>19</b> | 64534           | Pim3          | 0.93          | 3.6E-12          |
| <b>20</b> | 306330          | Klf2          | 0.91          | 1.4E-07          |
| <b>21</b> | 64194           | Insig1        | 0.88          | 2.4E-06          |
| <b>22</b> | 24883           | Wt1           | 0.84          | 1.0E-02          |
| <b>23</b> | 316842          | Metrn1        | 0.84          | 1.3E-10          |
| <b>24</b> | 306636          | Efnb2         | 0.81          | 1.3E-06          |
| <b>25</b> | 300866          | Lca5          | 0.81          | 2.5E-03          |
| <b>26</b> | 295588          | Rnd3          | 0.79          | 2.6E-02          |
| <b>27</b> | 29517           | Sgk1          | 0.79          | 1.4E-07          |
| <b>28</b> | 362598          | Sh3d21        | 0.79          | 2.2E-02          |
| <b>29</b> | 363243          | Klf7          | 0.77          | 8.5E-08          |
| <b>30</b> | 24323           | Edn1          | 0.74          | 2.2E-02          |
| <b>31</b> | 498159          | Spry3         | 0.74          | 4.6E-02          |
| <b>32</b> | 64373           | Rhob          | 0.74          | 1.4E-07          |
| <b>33</b> | 310533          | Rapgef2       | 0.72          | 6.1E-06          |
| <b>34</b> | 25675           | Hmgcr         | 0.70          | 1.3E-06          |
| <b>35</b> | 81503           | Cxcl1         | 0.69          | 4.9E-04          |
| <b>36</b> | 287925          | Pkp2          | 0.69          | 2.1E-03          |
| <b>37</b> | 500400          | Fam110b       | 0.69          | 8.1E-04          |
| <b>38</b> | 292844          | Siglec10      | 0.67          | 2.2E-02          |
| <b>39</b> | 499528          | Ccno          | 0.63          | 2.2E-02          |
| <b>40</b> | 25556           | Il1rl1        | 0.62          | 2.2E-02          |
| <b>41</b> | 364754          | Fzd8          | 0.60          | 3.0E-04          |
| <b>42</b> | 24577           | Myc           | 0.60          | 4.9E-04          |
| <b>43</b> | 24530           | Leat          | 0.60          | 2.9E-02          |
| <b>44</b> | 500300          | LOC500300     | 0.60          | 5.5E-03          |

|    |           |            |       |         |
|----|-----------|------------|-------|---------|
| 45 | 360580    | Dusp14     | 0.59  | 5.1E-04 |
| 46 | 498796    | Fam107b    | 0.59  | 5.6E-06 |
| 47 | 365864    | Tuft1      | 0.59  | 3.9E-05 |
| 48 | 89830     | Ptch1      | 0.58  | 1.1E-03 |
| 49 | 58834     | Dlc1       | 0.57  | 4.2E-04 |
| 50 | 299694    | Nuak1      | 0.57  | 7.9E-04 |
| 51 | 246760    | Mafk       | 0.56  | 3.5E-04 |
| 52 | 360202    | Ston1      | 0.55  | 3.5E-04 |
| 53 | 501584    | Amer1      | 0.55  | 3.9E-05 |
| 54 | 24373     | Fst        | 0.55  | 2.3E-03 |
| 55 | 300438    | Ldlr       | 0.54  | 1.7E-03 |
| 56 | 315259    | Prickle1   | 0.54  | 2.4E-03 |
| 57 | 688993    | Kctd7      | 0.53  | 2.7E-02 |
| 58 | 65154     | Wisp1      | 0.53  | 4.0E-02 |
| 59 | 63839     | Fhl2       | 0.52  | 6.0E-04 |
| 60 | 64562     | Prkab2     | 0.51  | 1.1E-02 |
| 61 | 498963    | Spata2L    | 0.51  | 4.2E-02 |
| 62 | 81809     | Tgfb2      | 0.51  | 5.4E-04 |
| 63 | 305922    | Lats2      | 0.50  | 1.3E-03 |
| 64 | 686117    | Meis1      | 0.50  | 2.7E-04 |
| 65 | 25690     | Ahr        | 0.50  | 4.2E-02 |
| 66 | 140910    | Msmo1      | 0.50  | 9.3E-04 |
| 67 | 300803    | Lactb      | 0.50  | 3.3E-03 |
| 68 | 299139    | Slc38a6    | 0.50  | 4.9E-02 |
| 69 | 25105     | Nppb       | 0.50  | 1.5E-02 |
| 70 | 29376     | Irs2       | 0.48  | 9.5E-03 |
| 71 | 310341    | Fat4       | 0.47  | 3.3E-02 |
| 72 | 29619     | Btg2       | 0.46  | 1.5E-02 |
| 73 | 291699    | Stard4     | 0.46  | 2.9E-02 |
| 74 | 83514     | Tsc22d3    | 0.46  | 8.9E-03 |
| 75 | 309728    | Arid5b     | 0.44  | 2.6E-03 |
| 76 | 501099    | Srf        | 0.43  | 1.8E-02 |
| 77 | 296583    | Nacc2      | 0.43  | 2.6E-02 |
| 78 | 500000    | Cldn12     | 0.43  | 3.9E-02 |
| 79 | 691922    | Nt5dc3     | 0.42  | 3.4E-02 |
| 80 | 499891    | RGD1565616 | 0.41  | 1.4E-02 |
| 81 | 29230     | Sqle       | 0.40  | 4.2E-02 |
| 82 | 311630    | Zswim3     | 0.39  | 2.5E-02 |
| 83 | 360899    | Sertad4    | 0.38  | 4.6E-02 |
| 84 | 303185    | Flcn       | -0.38 | 4.2E-02 |
| 85 | 94268     | Efna1      | -0.42 | 6.3E-03 |
| 86 | 314480    | Gpr132     | -0.48 | 1.3E-02 |
| 87 | 246142    | Bmf        | -0.51 | 2.9E-02 |
| 88 | 501925    | Slc2a9     | -0.51 | 3.2E-02 |
| 89 | 295934    | Chst1      | -0.52 | 2.6E-02 |
| 90 | 100526644 | Mir3593    | -0.60 | 6.7E-03 |
| 91 | 289399    | RGD1311892 | -0.69 | 1.5E-02 |

|           |        |         |       |         |
|-----------|--------|---------|-------|---------|
| <b>92</b> | 66015  | Adamts4 | -0.70 | 2.7E-06 |
| <b>93</b> | 117274 | Nr0b2   | -0.70 | 8.5E-03 |
| <b>94</b> | 297902 | Gem     | -0.81 | 8.2E-09 |

**Figure S1. Characterization of mouse and rat CPCs.**

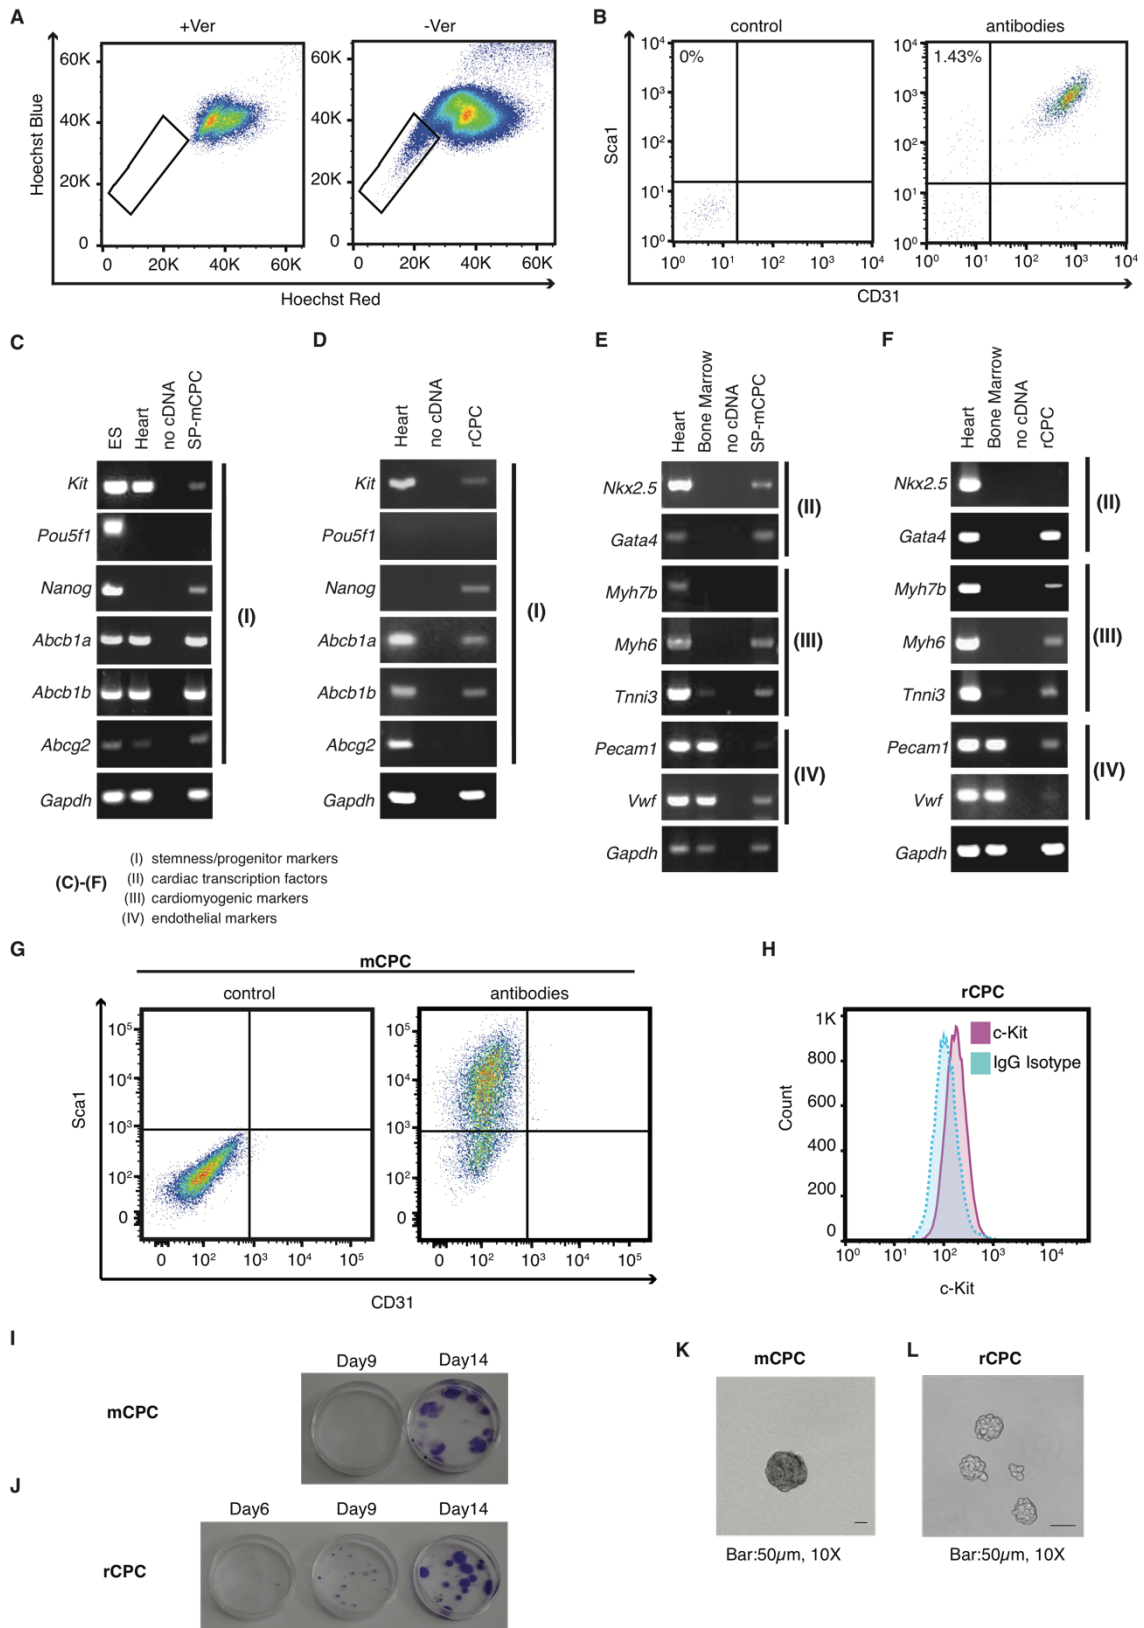

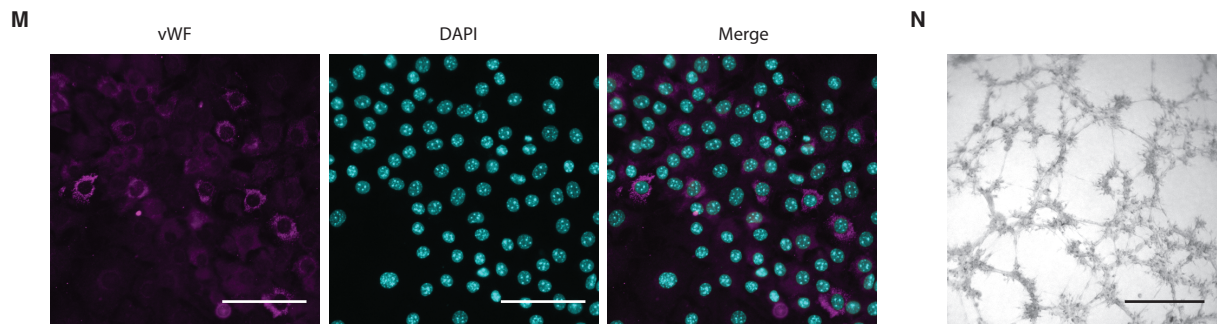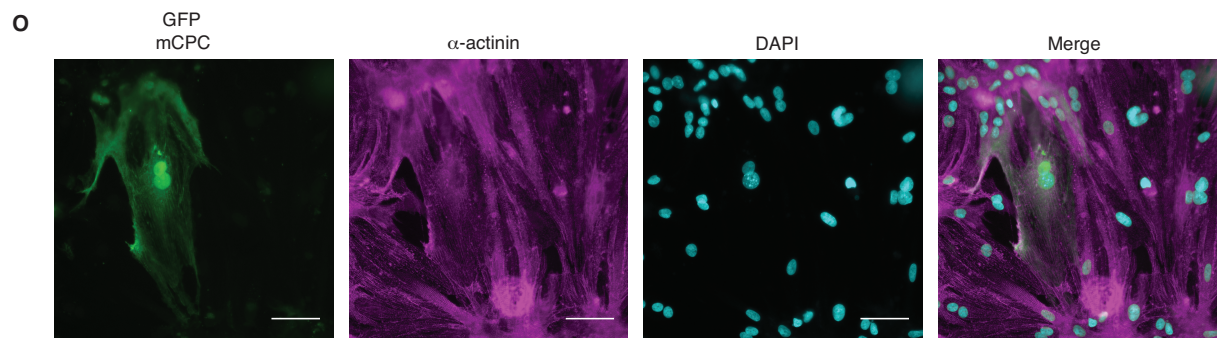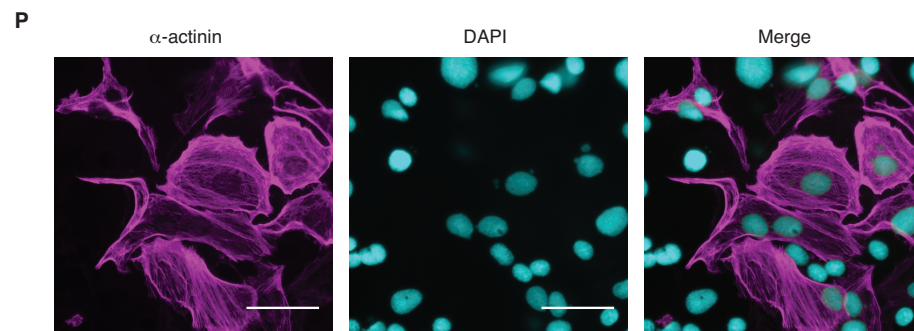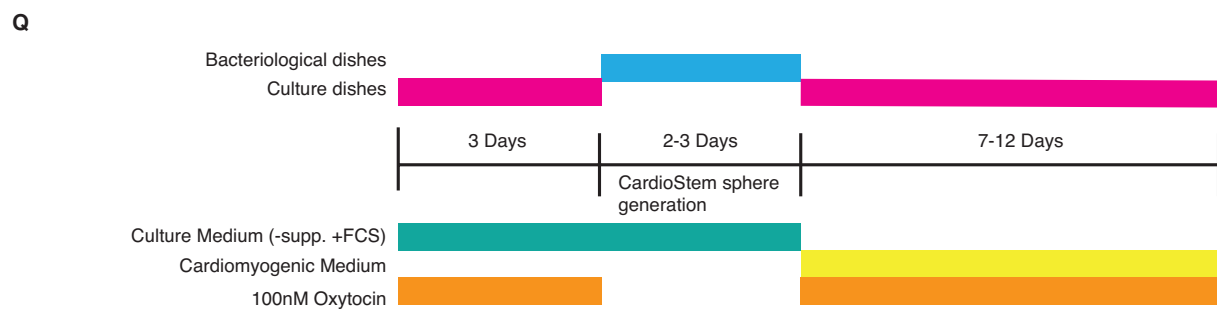

**(A), (B)** *Isolation of Sca1<sup>+</sup>CD31<sup>-</sup> side population (SP) mouse CPCs (SP-mCPCs).* (A) Sorting of freshly isolated cardiac SP-mCPCs by Hoechst 33324 staining with/without Verapamil (Ver; ABC transporter inhibitor) using flow cytometry. (B) Staining of freshly isolated SP-mCPCs with anti-CD31 and Sca1 antibodies (control: non-stained freshly isolated SP-mCPCs; percentage given for Sca1<sup>+</sup>/CD31<sup>-</sup> fraction). **(C), (D)** *Gene expression of stemness and progenitor markers of SP-mCPCs and of rat CPCs isolated based on c-kit positivity (rCPCs).* Gene expression was assessed by PCR. Mouse embryonic stem cells (ES) and mouse or rat whole heart homogenate were used as positive and negative controls, respectively. **(F), (E)** *Gene expression of cardiac transcription factors and cardiomyogenic and endothelial lineage markers.* Whole heart homogenate was used as positive control for all markers, and bone marrow as positive control for endothelial and negative control for cardiomyogenic markers. **(G), (H)** *Assessment of surface marker expression in expanded mouse and rat CPCs.* (G) Flowcytometry of expanded SP-mCPCs stained with anti-CD31 and Sca1 antibodies (control: non-stained expanded SP-mCPCs). (H) Flowcytometry of expanded rCPCs stained with anti-c-Kit antibody or IgG isotype. **(I), (J)** *Clonogenicity of mouse and rat CPCs.* Representative images of clone formation after the days indicated for mCPCs (I) and rCPCs (J). **(K), (L)** *CardioStem Sphere (CSS) formation of mCPC (K) and rCPC (L).* Bar: 50µm. **(M), (N)** *Expanded SP-mCPCs can differentiate into endothelial cells.* (M) vWF protein expression after 3 weeks in endothelial differentiation medium. (N) Tube formation of SP-mCPCs primed and differentiated on LN for three weeks after 24 hours in matrigel. **(O)-(Q)** *Cardiomyogenic differentiation of SP-mCPCs and rCPCs.* (O) Cardiomyogenic differentiation of freshly isolated GFP-SP-mCPCs co-cultured with neonatal rat cardiomyocytes for 3 weeks. Bar: 50µm. (P) Cardiomyogenic differentiation of CSS-derived rCPC according to the protocol depicted in (Q) (for detailed description please see manuscript Methods section)<sup>1</sup>. Bar: 50µm.

Abcb1a: ATP-binding cassette, sub-family B (MDR/TAP), member 1A (Mdr1a); Abcb1b: ATP-binding cassette, subfamily B (MDR/TAP), member 1B (Mdrab); Abcg2: ATP-binding cassette, subfamily G (WHITE), member 2 (BCRP1); Gapdh: glyceraldehyde-3-phosphate dehydrogenase; Gata4: GATA binding protein 4; Kit: v-kit Hardy-Zuckerman 4 feline sarcoma viral oncogene homolog; Myh6: myosin, heavy chain 6, cardiac muscle, alpha; Myh7b: myosin, heavy chain 7B, cardiac muscle, beta; Nanog: Nanog homeobox; Nkx2.5: NK2 homeobox 5; Pecam1: platelet/endothelial cell adhesion molecule 1 (CD31); Pou5f1: POU domain, class 5, transcription factor 1 (Oct-4); Tnni3: troponin I, cardiac 3; Vwf: Von Willebrand factor



**Figure S2. Non-normalized data of gene expression as per Figure 1.**

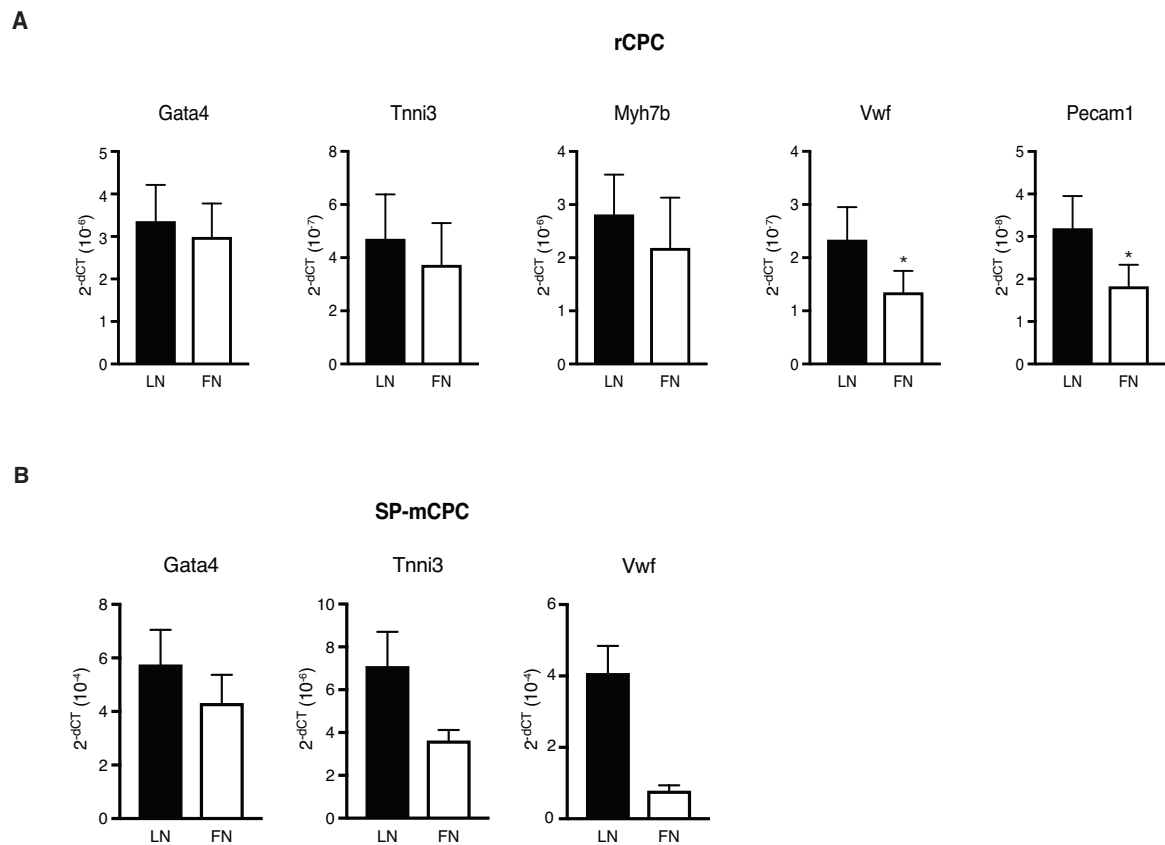

**(A)** Lineage gene expression of rCPCs on LN and FN as per Figure 1C. \* $p < 0.05$  for LN vs. FN (Wilcoxon signed rank test). **(B)** Lineage gene expression of SP-mCPCs on LN and FN as per Figure 1D. Data are given as mean  $\pm$  SEM. LN: laminin; FN: fibronectin; rCPCs: rat cardiac progenitor cells; SP-mCPCs: side population mouse cardiac progenitor cells.

**Figure S3. Lineage marker expression in CPCs in 3D-culture on LN- and FN-coated scaffolds using a perfusion bioreactor.**

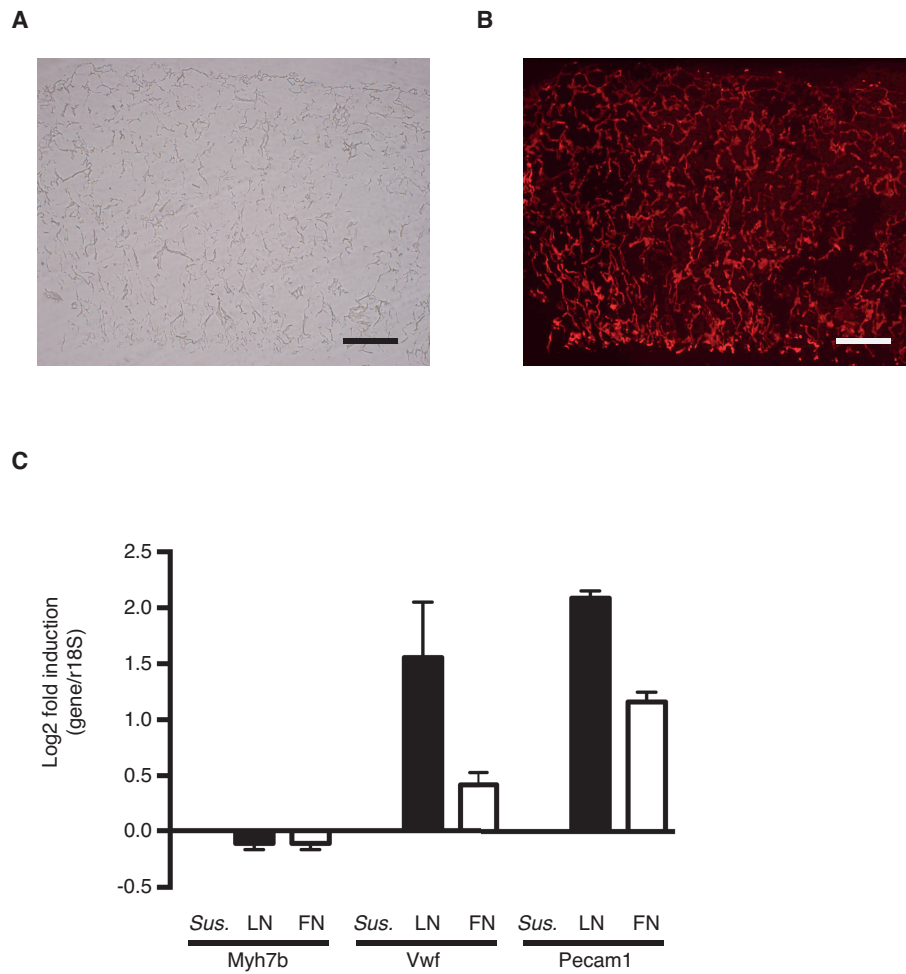

*Collagen scaffold coated with Laminin. (A) Bright filter; (B) Alexa546 shows LN. Scaffolds were incubated with 10 $\mu$ g/mL LN; Bar: 500 $\mu$ m. (C) LN also enhances commitment towards the endothelial lineage compared to FN in perfusion-based bioreactor 3D-culture. Gene expression by qRT-PCR (n=3). rCPCs were plated on LN- or FN-coated scaffolds with 1% FBS. Data are given as mean  $\pm$ SEM. Sus.: suspension; LN: laminin; FN: fibronectin; rCPCs: rat cardiac progenitor cells.*

**Figure S4.**

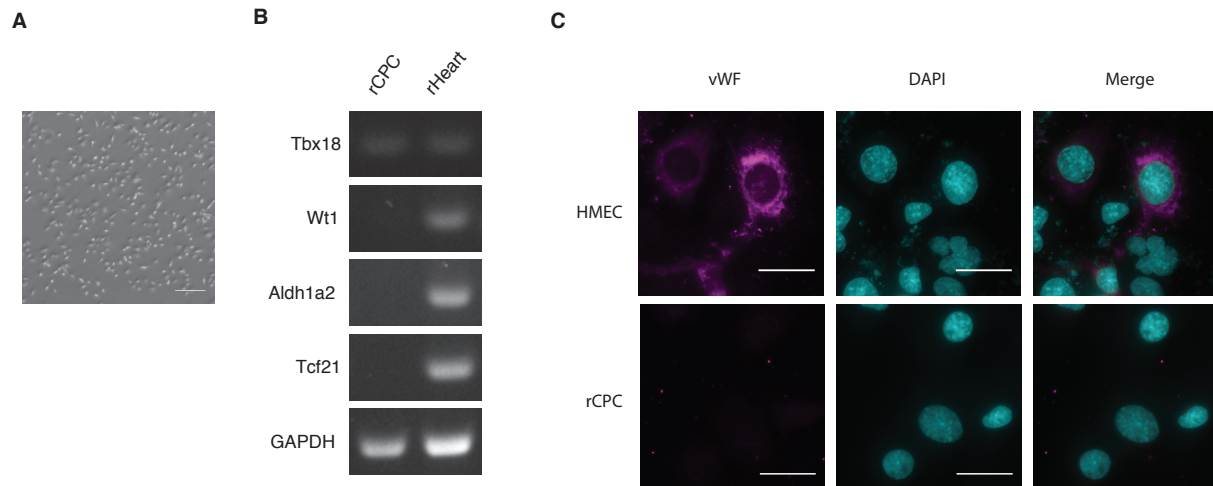

**(A) Morphology of rat CPCs under growth conditions.** rCPCs are an inhomogeneous cell population encompassing cells with different shapes. **(B) Gene expression of epicardial markers in rat CPCs.** Tbx18 is the only marker expressed in rCPCs. Wt1: Wilms tumor protein 1; Aldh1a2: aldehyde dehydrogenase 1 family member a2; Tcf21: transcription factor 21. rHeart: RNA from neonatal rat heart serving as positive control. **(C) Rat CPCs do not express von Willebrand factor protein in culture medium (F12).** Human microvascular endothelial cells (HMEC) were used as positive control. vWF: von Willebrand Factor, rCPC: rat CPCs. Bar: 25 $\mu$ m.

**Figure S5**

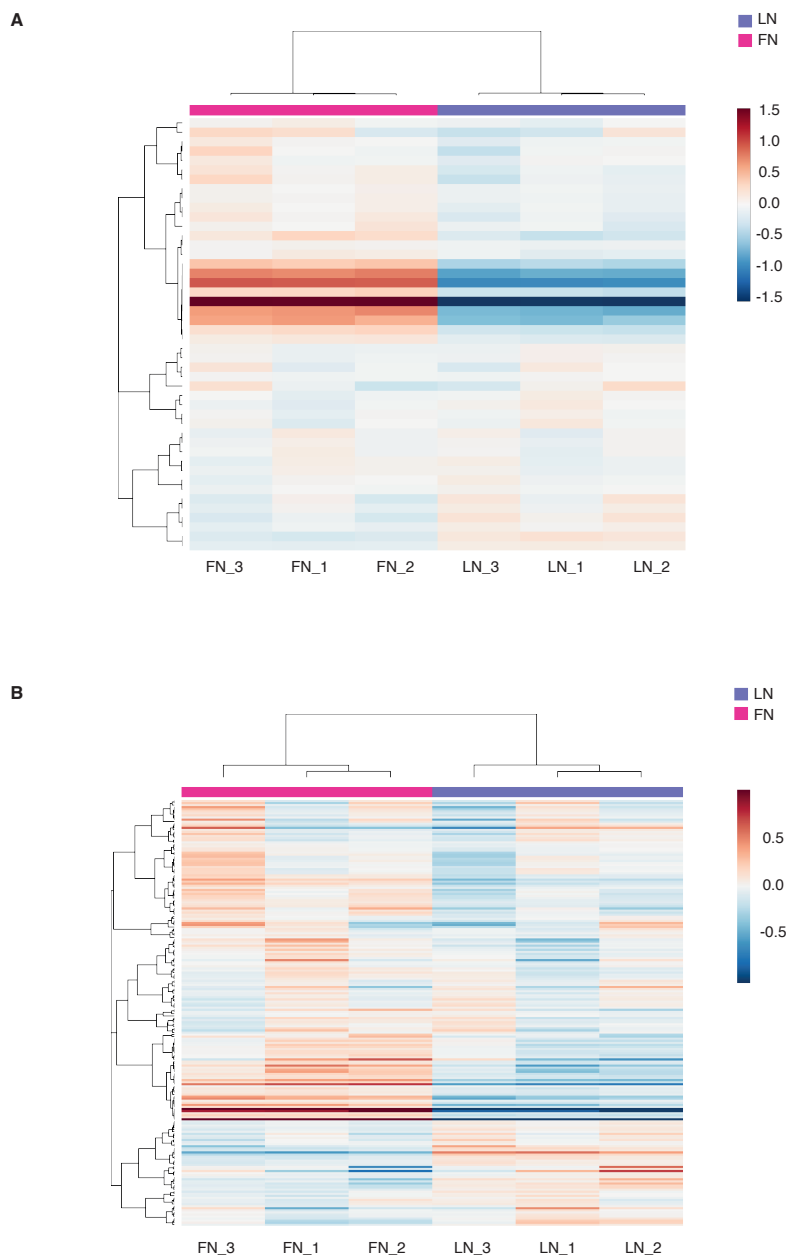

**Heat maps of gene expression from enriched gene sets as identified by Gene Set Enrichment Analysis (GSEA) in rat CPCs on LN and FN.**

**(A)** CORDENONSI\_YAP\_CONSERVED\_SIGNATURE. **(B)** WGGAAATGY\_V\$TEF1\_Q6.

**Supplemental References:**

1. Smith AJ, Lewis FC, Aquila I, Waring CD, Nocera A, Agosti V, Nadal-Ginard B, Torella D, Ellison GM. Isolation and characterization of resident endogenous c-kit<sup>+</sup> cardiac stem cells from the adult mouse and rat heart. *Nat Protoc.* 2014;9:1662-1681.
